# Supplementary material
Source: publisher figshare collection journal article supplement (https://tandf.figshare.com/ndownloader/files/17960882)
Supplement: Supplementary file 1 [file 17960882]

# Supplementary material

Table 3: Logistic regression general linear model with OA as the dependent variable

|  |  | **Confidence interval 95%** | |  |  |
| --- | --- | --- | --- | --- | --- |
|  | **Coefficient** | **lower** | **upper** | **t** | **Sig.** |
| **(Intercept)** | 1.54 | 0.84 | 2.83 | 1.39 | 0.17 |
| **game_number** | 0.98 | 0.91 | 1.05 | -0.61 | 0.54 |
| **TAS EOT** | 1.00 | 0.97 | 1.03 | 0.12 | 0.90 |
| **game number*TAS EOT** | 1.00 | 1.00 | 1.00 | -0.08 | 0.94 |

Note: EOT=Externally Oriented Thinking, * p < .05

Table 4: Logistic regression general linear model with IA as the dependent variable

|  |  | **Confidence interval 95%** | |  |  |
| --- | --- | --- | --- | --- | --- |
|  | **Coefficient** | **lower** | **upper** | **t** | **Sig.** |
| **(Intercept)** | 1.23 | 0.93 | 1.63 | 1.46 | 0.15 |
| **game number** | 0.99 | 0.96 | 1.02 | -0.65 | 0.52 |
| **TAS EOT** | 1.00 | 0.99 | 1.01 | 0.04 | 0.97 |
| **game number*TAS EOT** | 1.00 | 1.00 | 1.00 | -0.26 | 0.79 |

Note: EOT=Externally Oriented Thinking, * p < .05
